# Supplementary material for: Aggregates of octenylsuccinate oat β-glucan as novel capsules to stabilize curcumin over food processing, storage and digestive fluids and to enhance its bioavailability
Source: Royal Society of Chemistry journal article supplement (doi:10.1039/c7fo01569k), 2017-11-28
Supplement: c7fo01569k1.pdf [file c7fo01569k1.pdf]

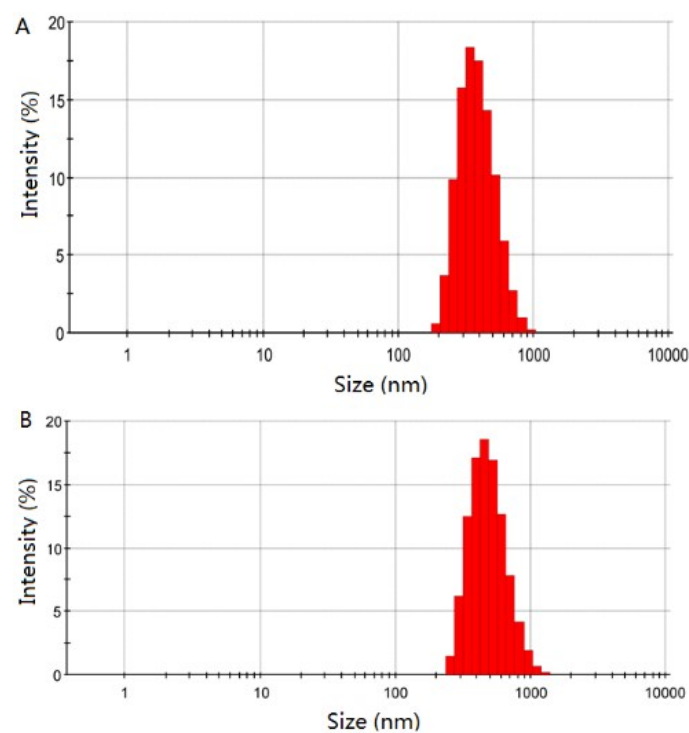

**Supporting material 1** Particle size distribution patterns of curcumin loaded octenylsuccinate oat

$\beta$ -glucan aggregates upon the thermal treatment at 80 °C (A) and 90 °C (B) for 30 min.
